# Supplementary material for: Premature ageing in mice expressing defective mitochondrial DNA polymerase
Source: Springer Nature journal article supplement (doi:10.1038/nature02517), 2004-05-01
Supplement: 41586_2004_BFnature02517_MOESM4_ESM.doc [file 41586_2004_BFnature02517_MOESM4_ESM.doc]

**Legend to Supplementary Figure 2.**

Biochemical analysis of respiratory chain function in mtDNA-mutator (red bars) and wild-type (blue bars) mouse hearts at 12, 25 and 40 weeks of age. Bars present mean levels ± standard error of the mean (S.E.M.). Asterisks indicate level of statistical significance (* p<0.05; ** p<0.01; *** p<0.001, Student’s *t*-test). The analyses were performed on heart tissue from 6 wild-type and 6 mtDNA-mutator mice at the age of 12 and 25 weeks and 3 wild-type and 3 mtDNA-mutator mice at the age of 40 weeks. **a.** Citrate synthase (CS) activity in heart muscle. **b.** Relative enzyme activities of respiratory chain enzymes. NADH cytochrome *c* reductase (NCR), corresponding to complex I + III; NADH coenzyme Q reductase (NQR), complex I; succinate:cytochrome *c* reductase (SCR), complex II + III; cytochrome *c* oxidase (COX), complex IV. The observed decline of respiratory chain enzyme activities had a profile consistent with being induced by mutations of mtDNA. The succinate cytochrome *c* reductase activity (SCR), which is mainly dependent on the activity of the exclusively nucleus encoded succinate dehydrogenase, was normal, whereas the activites of the other enzyme complexes, all of which contain critical mtDNA-encoded subunits, were reduced. **c.** Measurements of mitochondrial ATP production rate (MAPR) per unit of CS activity with substrates that enter the respiratory chain at different points. MAPR was determined with seven different substrate combinations: glutamate + succinate (G+S), glutamate + malate (G+M), TMPD + ascorbate (T+A), pyruvate + malate (P+M), palmitoyl-L-carnitine + malate (PC+M), succinate + rotenone (S+R) and succinate (S). **d.** Measurements of MAPR per kg of muscle with substrates that enter the respiratory chain at different points. We have previously performed MAPR measurements in animals with tissue-specific reduction in mtDNA expression and observed reduced oxidation of glutamate, pyruvate and ascorbate, whereas the oxidation of palmitoyl-L-carnitine and succinate was normal or increased. The oxidation of the same substrates in heart mitochondria from mtDNA-mutator mice generates a very similar MAPR pattern. The MAPR in relation to heart tissue mass was less affected than MAPR in relation to citrate synthase activity. These findings are consistent with the suggestion that an increase of mitochondrial mass partly compensates for respiratory chain deficiency by increasing overall MAPR.
