# Supplementary material for: Premature ageing in mice expressing defective mitochondrial DNA polymerase
Source: Springer Nature journal article supplement (doi:10.1038/nature02517), 2004-05-01
Supplement: 41586_2004_BFnature02517_MOESM6_ESM.doc [file 41586_2004_BFnature02517_MOESM6_ESM.doc]

Supplementary Table 2. Organ mass (mg)

12 weeks 25 weeks 40 weeks

+/+ mut/mut +/+ mut/mut +/+ mut/mut

Heart 155+8 173+7 170+9 165+7 178+15 163+10

Spleen 75+8 93+5 125+10 198+26* 153+21 209+24

Liver 1230+52 1325+73 1610+12 1580+76 2083+485 1594+83

Testis 293+18 110+6*** 274+22 110+15*** 343+14 102+10***

Kidney 373+21 398+32 474+34 360+22* 523+57 348+29*

All values are presented as mean + 1 SEM. Significant differences between wildtype (+/+; n = 6-11) and mtDNA- mutator (mut/mut; n = 6-11) mice are indicated by asterisks (*, P<0.05; **, P<0.01; ***, P<0.001)
