# Supplementary figures and images for: Premature ageing in mice expressing defective mitochondrial DNA polymerase
Source: Springer Nature journal article supplement (doi:10.1038/nature02517), 2004-05-01

**a**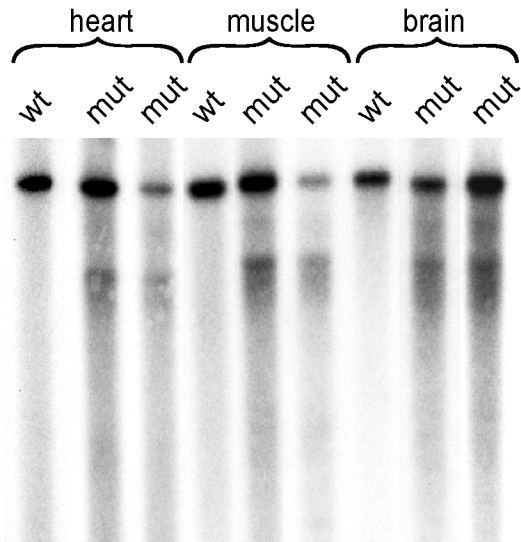**b**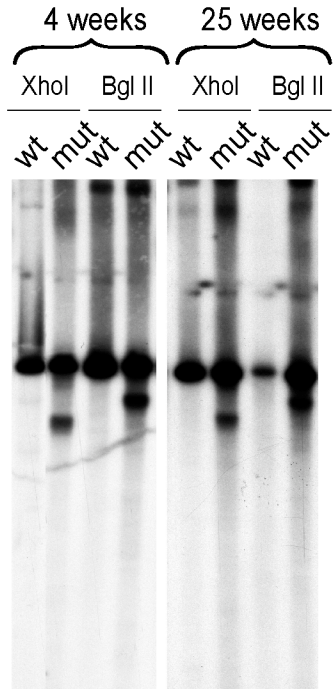**c**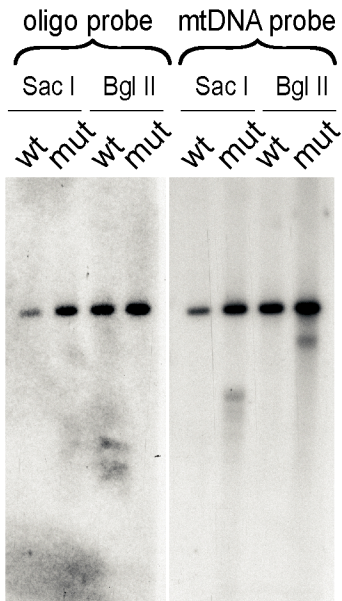**d**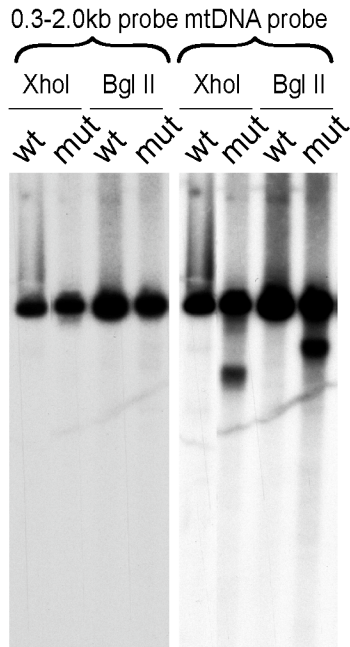**e**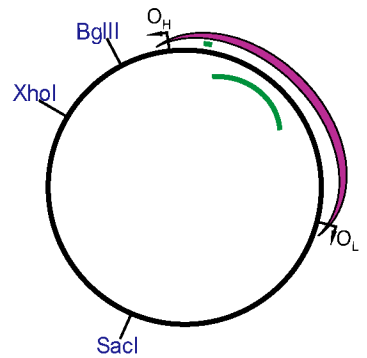

Supplement: 41586_2004_BFnature02517_MOESM1_ESM.pdf [file 41586_2004_BFnature02517_MOESM1_ESM.pdf]

**a**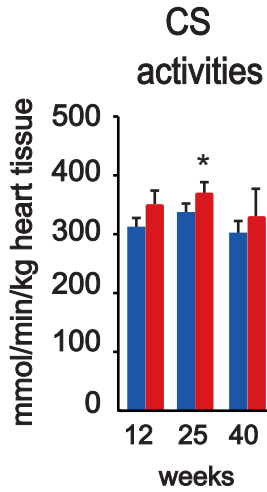**b**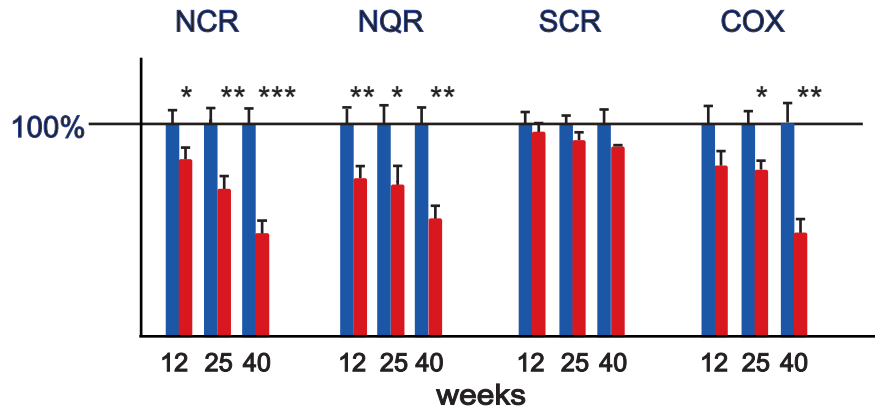**c**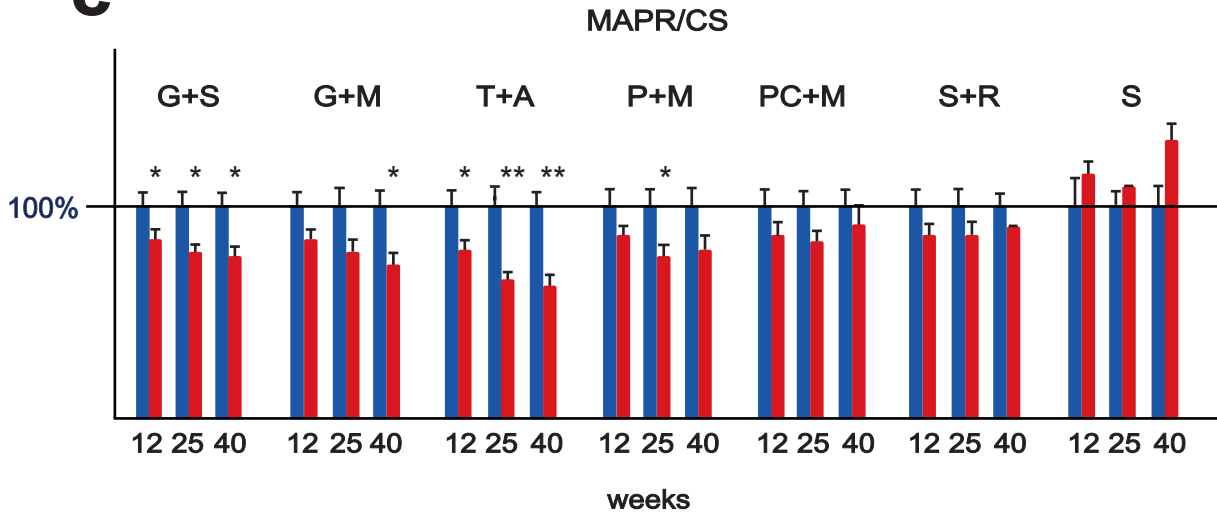**d**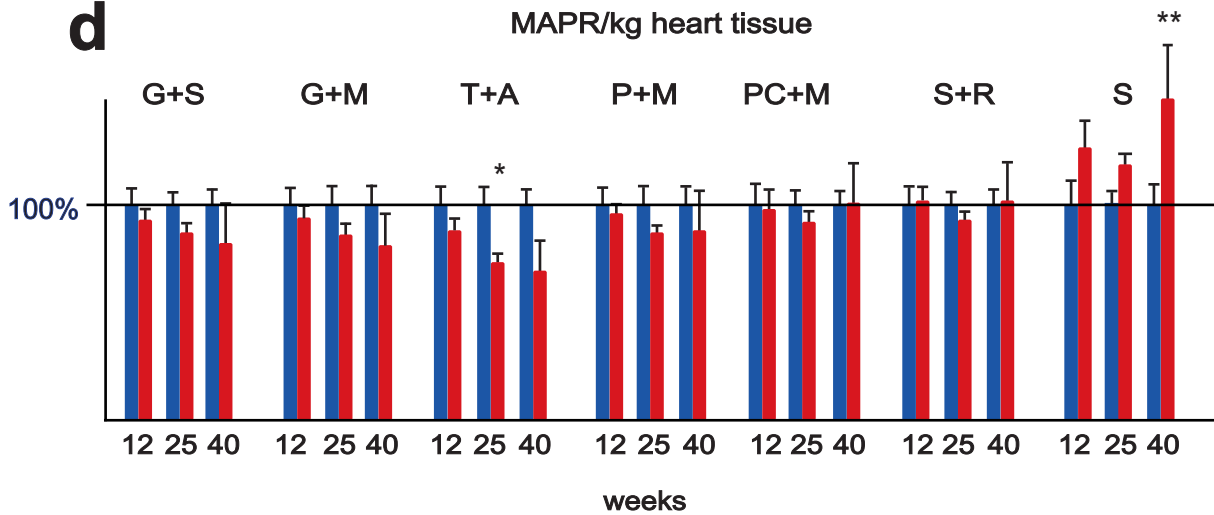

Supplement: 41586_2004_BFnature02517_MOESM2_ESM.pdf [file 41586_2004_BFnature02517_MOESM2_ESM.pdf]
